# Supplementary material
Source: publisher figshare collection journal article supplement (https://springernature.figshare.com/ndownloader/files/7069127)

Suppl. Figure 2

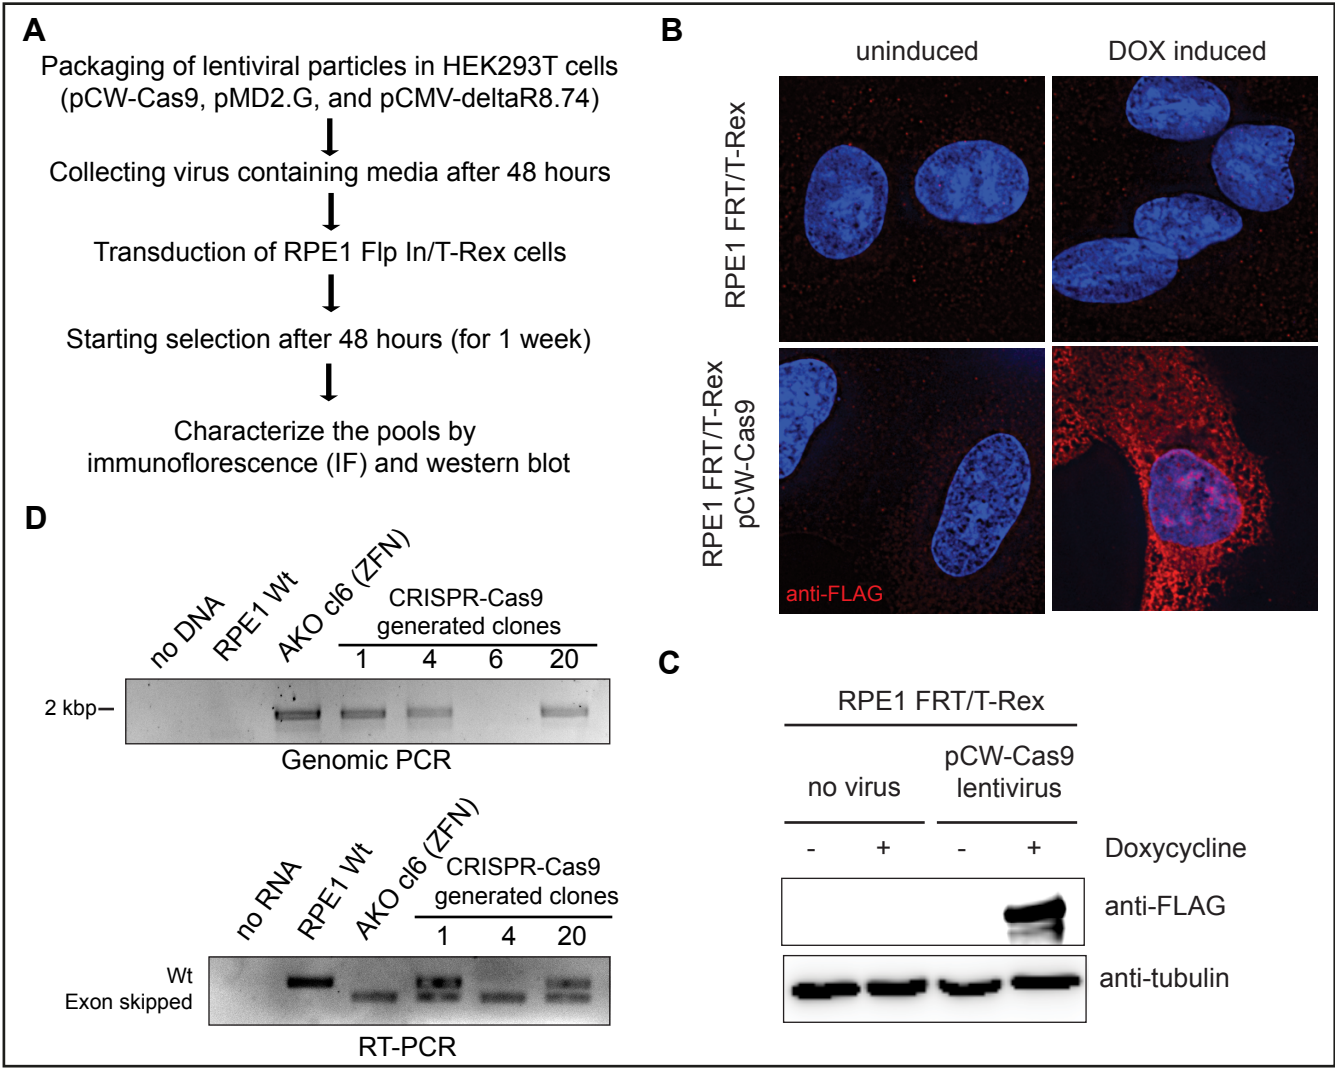

Supplement: Supplementary file [file 7069127]
